# Supplementary material for: Ion Mobility in Thick and Thin Poly-3,4 Ethylenedioxythiophene Films—From EQCM to Actuation
Source: MDPI journal article supplement (doi:10.3390/polym13152448), 2021-07-25
Supplement: s1 [file s1]

## **Supplementary**

### **Ion Mobility in Thick and Thin Poly-3,4-Ethylenedioxythiophene Films— From EQCM to Actuation**

Rudolf Kiefer<sup>1,\*</sup>, Daniel Georg Weis<sup>2,3</sup>, Bharath Kumar Velmurugan<sup>4</sup>, Tarmo Tamm<sup>5</sup> and Gerald Urban<sup>3,6</sup>

<sup>1</sup>Conducting polymers in composites and applications Research Group, Faculty of Applied Sciences, Ton Duc Thang University, Ho Chi Minh City, Vietnam

<sup>2</sup>Institute of Physical Chemistry, Albert-Ludwigs-Universität Freiburg, Albertstraße 21, D-79104 Freiburg im Breisgau, Germany

<sup>3</sup>FMF - Freiburger Materialforschungszentrum, University of Freiburg, Stefan-Meier-Straße 21, D-79104 Freiburg im Breisgau, Germany

<sup>4</sup>Department of Medical Laboratory Science and Biotechnology, Asia University, Taichung, Taiwan

<sup>5</sup>Intelligent Materials and Systems Lab, Faculty of Science and Technology, University of Tartu, Nooruse 1, 50411 Tartu, Estonia

<sup>6</sup>IMTEK – Institute for Microsystem Technology, Laboratory for Sensors, Georges-Koehler-Alle 103, D-79110 Freiburg im Breisgau, Germany

\*Corresponding author. Tel: +886 905605515. E-mail: rudolf.kiefer@tdut.edu.vn (Rudolf Kiefer)

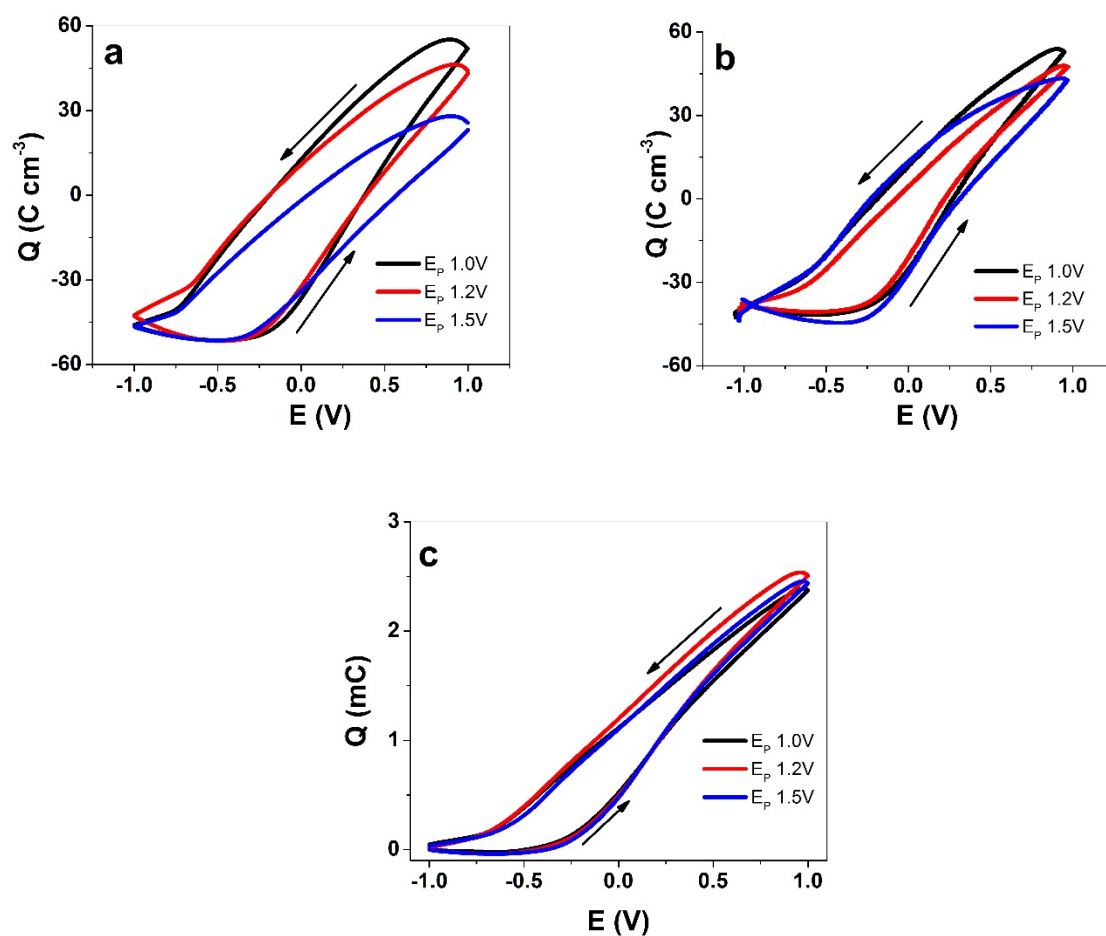

Figure S1. Charge potential curves in cyclic voltammetry ( $\pm 1.0V$ , TBAPF<sub>6</sub>-PC electrolyte) of PEDOT films made at  $E_p$  1.0V (black curve),  $E_p$  1.2V (red curve) and  $E_p$  1.5V (blue curve) shown in a: for PEDOT-FF, in b: for PEDOT-BL and c: for EQCM measurements. The arrows indicate the start and end points of the 3<sup>rd</sup> cycle.

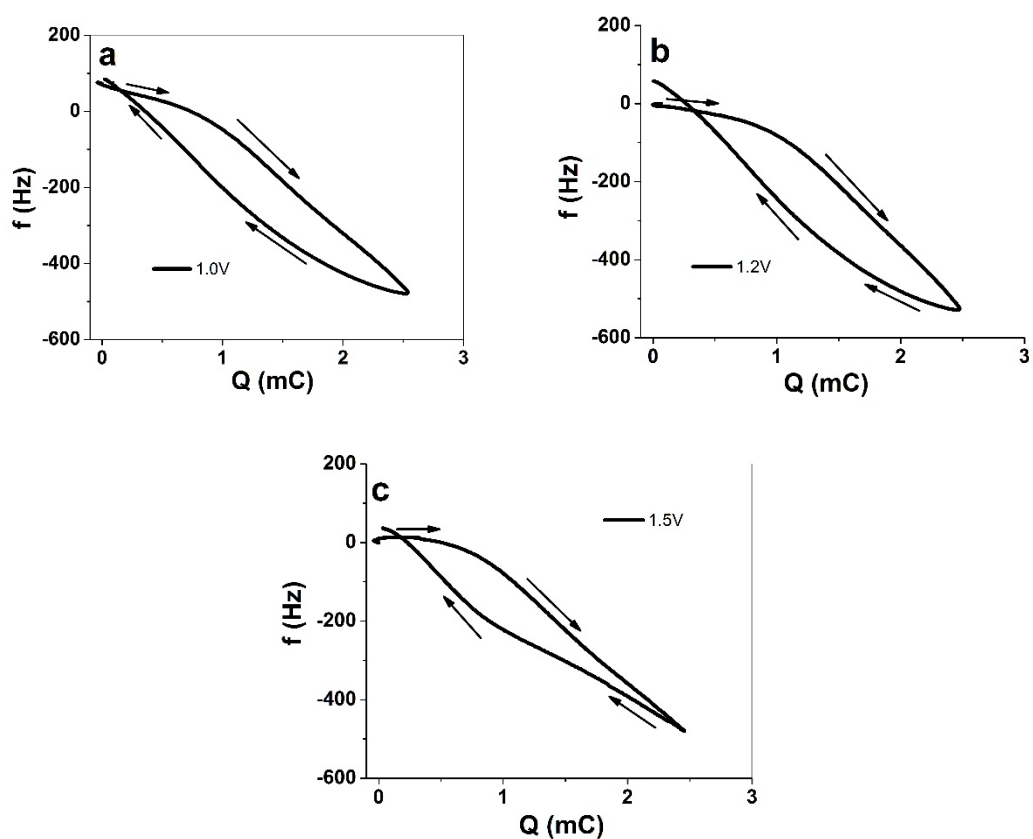

Figure S2. Cyclic voltammetric (scan rate  $10 \text{ mV s}^{-1}$ ) in TBAPF<sub>6</sub>-PC electrolyte at  $\pm 1.0\text{V}$  showing EQCM measurements of frequency  $f$  against charge  $Q$  of PEDOT films on quartz crystals polymerized at a:  $E_P$  1.0V, b:  $E_P$  1.2V and c:  $E_P$  1.5V. The arrows indicate the direction of the scan (starting point -1.0V).
